# Supplementary material for: Enrichment of Wheat Bread with Platycodon grandiflorus Root (PGR) Flour: Rheological Properties and Microstructure of Dough and Physicochemical Characterization of Bread
Source: MDPI journal article supplement (doi:10.3390/foods12030580), 2023-01-29
Supplement: s1 [file s1]

## SUPPLEMENTARY MATERIALS

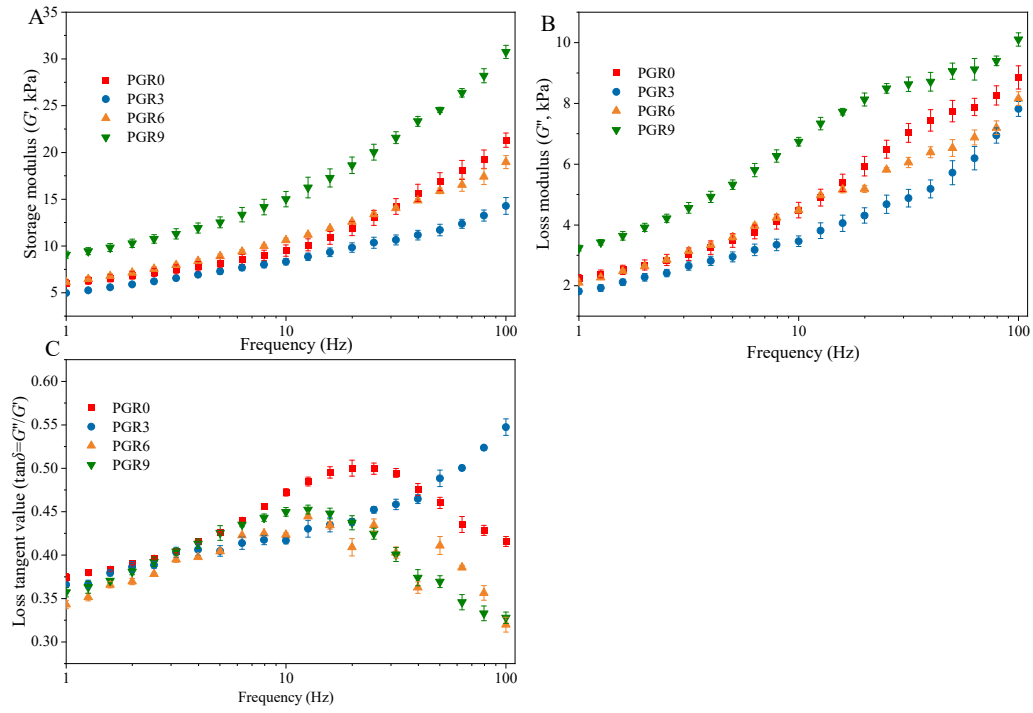

**Figure S1.** Rheological behavior curves of dough with different substitution levels of PGR flour. A: Storage modulus ( $G'$ , kPa), B: Loss modulus ( $G''$ , kPa), C: Loss tangent values ( $\tan \delta$ )
